# Supplementary material for: Satisfactory results after endoscopic gluteus medius repair combined with selective gluteus maximus reflected tendon release for the treatment of a full-thickness tear of gluteus medius
Source: PubMed Central journal article supplement (PMC10090025; doi:10.1007/s00167-022-07140-x), 2022-09-06
Supplement: 167_2022_7140_MOESM1_ESM.pdf [file 167_2022_7140_MOESM1_ESM.pdf]

**COMITATO ETICO INDIPENDENTE**  
IRCCS Istituto Clinico Humanitas

Prot. Nr. CE Humanitas ex D.M. 8/2/2013

618/17

18.12.2017

**IL COMITATO ETICO INDIPENDENTE**

Istituito con Delibera in data 30 Settembre 2016 si è riunito in data 18 Dicembre 2017 alle ore 13:00 nei locali dell'Istituto Clinico Humanitas in via - Manzoni n. 56 in Rozzano per valutare la documentazione, inerente la sperimentazione **Registro RCRA** avente per titolo:

**“STUDIO MULTICENTRICO PER LO SVILUPPO DI UN REGISTRO CLINICO E RADIOLOGICO DI SOGGETTI CANDIDATI AD ARTROPROTESI, REVISIONE DI ARTROPROTESI ED ALTRE PROCEDURE ORTOPEDICHE NON PROTESICHE”**

**Documenti esaminati:**

| Titolo                         | Ver | Data Ver   | File                                            | Nota |
|--------------------------------|-----|------------|-------------------------------------------------|------|
| Protocollo                     | 1.0 |            | Progetto registro protesi GAP_V1 01.06.2016.pdf |      |
| Informativa e consenso base    | 1   | 01-12-2017 | 20171201 standard consenso informato final.doc  |      |
| Bozza convenzione              |     |            | 20171201 standard contratto final.docx          |      |
| Informativa e consenso privacy | 1   | 01-12-2017 | 20171201 standard informativa privacy final.doc |      |

|                                  |                                        |
|----------------------------------|----------------------------------------|
| <b>Responsabile dello studio</b> | <b>Dr. GUIDO GRAPPIOLO</b>             |
| <b>Unità Operativa coinvolta</b> | <b>CHIRURGIA DELL'ANCA E PROTESICA</b> |

Rozzano, 18 Dicembre 2017

1

**COMITATO ETICO INDIPENDENTE**  
IRCCS Istituto Clinico Humanitas

Dopo valutazione il Comitato esprime:

PARERE UNICO

PARERE UNICO con riserva di:

PARERE FAVOREVOLE

PARERE FAVOREVOLE con riserva di:

PARERE SOSPESO

PARERE NON FAVOREVOLE

La sospensione di cui sopra è data in funzione di:

Lo scioglimento della riserva è affidato a:

Rozzano, 18 Dicembre 2017

2

## COMITATO ETICO INDIPENDENTE

IRCCS Istituto Clinico Humanitas

I componenti che il giorno 18 Dicembre 2017 si sono espressi in merito alla sperimentazione Registro RCRA avente per titolo:

**“STUDIO MULTICENTRICO PER LO SVILUPPO DI UN REGISTRO CLINICO E RADIOLOGICO DI SOGGETTI CANDIDATI AD ARTROPROTESI, REVISIONE DI ARTROPROTESI ED ALTRE PROCEDURE ORTOPEDICHE NON PROTESICHE”**

|                                                                          |                                                                                      |
|--------------------------------------------------------------------------|--------------------------------------------------------------------------------------|
| Avv. Agostino Migone De Amicis – Presidente                              |   |
| Prof. Carmelo Carlo Stella – Clinico                                     |   |
| Dott. Franco Pazzucconi – Farmacologo                                    |   |
| Dott. Michele Lagioia – Direttore Sanitario                              |                                                                                      |
| Dott. Sergio Pellegrino – Competente in Medicina Generale del Territorio |    |
| Dott. Valter Torri – Biostatistico                                       |   |
| Dott.ssa Maria Bellati – Rappresentante Fondazione Humanitas             |                                                                                      |
| Dott.ssa Maria Fazio – Farmacista                                        |                                                                                      |
| Dott.ssa Claudia Bacci - Farmacista                                      |  |
| Dott.ssa Barbara Miclini – Rappresentante infermieristico                |  |
| Dott. Marco Grimaldi – Esperto clinico del settore                       |  |
| Dott. Riccardo Caccialanza – Esperto in nutrizione                       |  |
| Dott. Alberto Podestà - Pediatra                                         |  |
| Prof. Stefano Duga – Esperto di genetica                                 |  |
| Prof. Alessandro Zerbi - Clinico                                         |                                                                                      |
| Dott.ssa Elena Milani – Ingegnere clinico ed esperta di dispositivi      |  |
| Prof. Alberto Mantovani – Direttore Scientifico                          |                                                                                      |
| Prof. Carlo Selmi - Clinico                                              |                                                                                      |
| Prof. Giancarlo Rovati – Bioetico                                        |  |

Il segretario Dott. Michele Tedeschi

Rozzano, 18 Dicembre 2017

3
